# Supplementary material for: Epigenetic modification of SALL1 as a novel biomarker for the prognosis of early stage head and neck cancer
Source: PubMed Central journal article supplement — J Cancer. 2018 Feb 28;9(6):941–9. doi: 10.7150/jca.23527 (PMC5868161; doi:10.7150/jca.23527), 2018-02-28

**Supplementary Table S1. qMSP primer and qRT primer list**

| PCR  | Gene  | Forward/Reverse | Base pairs | Sequence (5'-3')            |
|------|-------|-----------------|------------|-----------------------------|
| qMSP | SALL1 | Forward         | 102        | GTCGTCGTTTCGATTTTCGTAA      |
|      |       | Reverse         |            | CGCTTACTTCCTCCGCGACA        |
| qMSP | ACTB  | Forward         | 133        | TGGTGATGGAGGAGGTTTAGAAGT    |
|      |       | Reverse         |            | AACCAATAAAACCTACTCCTCCCTTAA |
| qRT  | SALL1 | Forward         | 117        | TCTGGGCCTCTGTCTTCCTC        |
|      |       | Reverse         |            | GGCACTGATGAGGAGAAGG         |
| qRT  | GAPDH | Forward         | 138        | GCACCGTCAAGGCTGAGAAC        |

**Supplementary Table S2. SALL1 gene methylation status in 96 matched pairs of tumor and adjacent normal mucosal tissues**

|             | SALL1 methylation |        | <i>P</i> -value† |
|-------------|-------------------|--------|------------------|
|             | Present           | Absent |                  |
| Tumor (96)  | 39                | 57     |                  |
| Normal (96) | 9                 | 89     | < 0.001          |

†Fisher's exact probability test.

\*  $P < 0.05$

**Supplementary Table S3. *SALL1* Gene Methylation Status in Primary Samples of HNSCC with the methylation of other tumor suppressor genes.**

| Patient and tumor characteristics ( <i>n</i> = 205) | Methylation              |                          | <i>P</i> -value |
|-----------------------------------------------------|--------------------------|--------------------------|-----------------|
|                                                     | Present ( <i>n</i> = 74) | Absent ( <i>n</i> = 131) |                 |
| <i>SALL3</i> methylation                            |                          |                          |                 |
| Yes (127)                                           | 56                       | 71                       | 0.003*          |
| No (78)                                             | 18                       | 60                       |                 |
| <i>CDH1</i> methylation                             |                          |                          |                 |
| Yes (103)                                           | 51                       | 52                       | < 0.001*        |
| No (102)                                            | 23                       | 79                       |                 |
| <i>RASSF1A</i> methylation †                        |                          |                          |                 |
| Yes (74)                                            | 35                       | 39                       | 1               |
| No (131)                                            | 39                       | 92                       |                 |
| <i>P16</i> methylation †                            |                          |                          |                 |
| Yes (58)                                            | 16                       | 42                       | 0.146           |
| No (147)                                            | 58                       | 89                       |                 |
| <i>MGMT</i> methylation †                           |                          |                          |                 |
| Yes (59)                                            | 23                       | 36                       | 1               |
| No (146)                                            | 51                       | 95                       |                 |
| <i>DAPK</i> methylation †                           |                          |                          |                 |
| Yes (92)                                            | 39                       | 53                       | 0.108           |
| No (113)                                            | 35                       | 78                       |                 |
| <i>DCC</i> methylation †                            |                          |                          |                 |
| Yes (113)                                           | 45                       | 68                       | 0.244           |
| No (92)                                             | 29                       | 63                       |                 |
| <i>CDH13</i> methylation †                          |                          |                          |                 |
| Yes (53)                                            | 23                       | 30                       | 1               |
| No (152)                                            | 51                       | 101                      |                 |
| <i>COL1A2</i> methylation †                         |                          |                          |                 |
| Yes (80)                                            | 30                       | 50                       | 1               |
| No (125)                                            | 44                       | 81                       |                 |

†Fisher's exact probability test \* *P* < 0.05

**Supplementary Fig. S1. Kaplan–Meier survival curves for patients with head and neck squamous-cell carcinoma (HNSCC).** A Joint analysis of the two genes showed a significant trend for decreased disease-free survival (DFS) as the number of methylated genes increased. DFS for HNSCC patients relative to **(A)** *SALL1* and *SALL3* methylation status and **(B)** *SALL1* and *CDH1* methylation status.

A

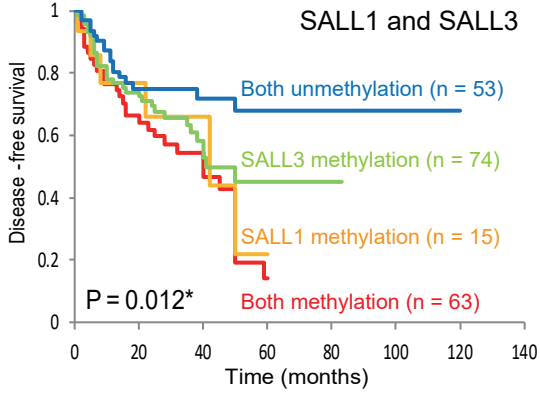

B

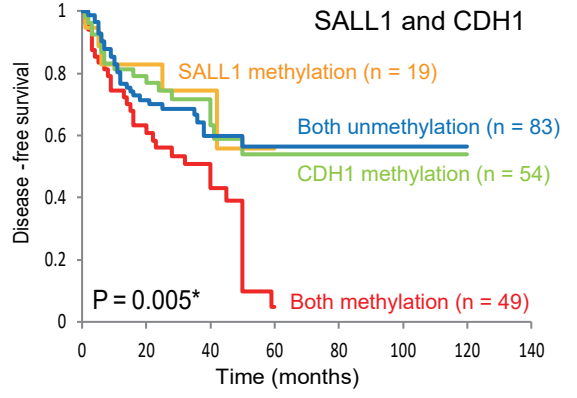

**Supplementary Fig. S2. *SALL1* DNA methylation and expression data for head and neck squamous-cell carcinoma (HNSCC) from TCGA database.** *SALL1* DNA methylation profiles of HNSCC and normal tissue samples ( $P < 0.001$ ). HNSC, head and neck squamous cell carcinoma; BLCA, bladder urothelial carcinoma; BRCA, breast carcinoma; COAD, colon adenocarcinoma; LUAD, lung adenocarcinoma; LUSC, lung squamous cell carcinoma; PAAD, pancreatic adenocarcinoma; PRAD, prostate adenocarcinoma; READ, rectum adenocarcinoma.

Supplementary Figure S2 Kiyoshi Misawa

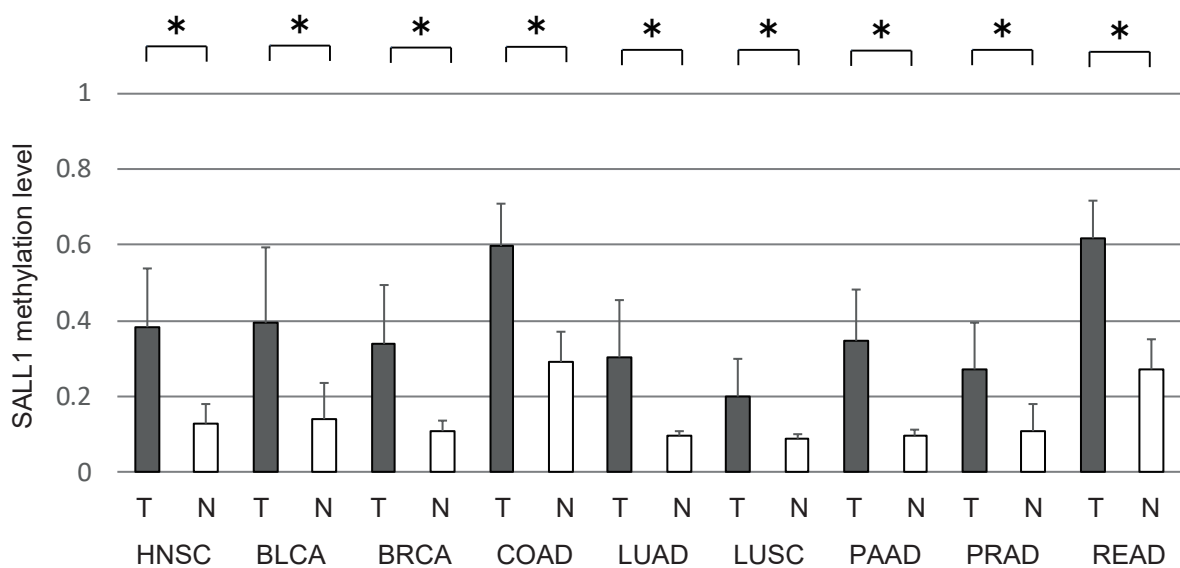

Supplement: jcav09p0941s1.pdf [file jcav09p0941s1.pdf]
